# Supplementary material
Source: bioRxiv or medRxiv preprint supplement (https://www.biorxiv.org/highwire/filestream/10778/field_highwire_adjunct_files/0/039693-1.pdf)

## Supplementary information

### Supplementary figure and table legends

#### Figure S1 - Workflow for data treatment procedure

#### Figure S2 - Feature comparison of simulated dataset with the real data

- (a) Lower cluster mean vs. lower cluster standard deviation.  $N_{\text{real}} = 1105$ ,  $N_{\text{simulated}} = 1000$
- (b) High cluster mean vs. lower cluster standard deviation.
- (c) Distribution of the frequency of lower fitness cluster.

#### Figure S3 - Evaluation of detection power relative to case loss

- (a) Evolution of area under the curve (AUC) with different combinations of parameters. X-axis: posterior probability cutoffs. Y-axis: Fraction of non-overlapping between clusters.
- (b) Number of cases that passed the threshold with different combinations of parameters. X-axis: posterior probability cutoffs. Y-axis: Fraction of non-overlapping between clusters.

#### Figure S3 - Evaluation of detection power relative to case loss

(a-c) Bulk segregant analysis identified causal genomic regions in traits related to co-segregation with NaCl (a), cycloheximide and anisomycin (b) and copper sulfate (c). One chromosomal region with significantly skewed allele frequency was found in each cross, which is presented with color codes. Schematic representations of the chromosome involved are shown, with x-axis corresponding to chromosomal coordinates and y-axis to the allele frequency of the isolates crossed with  $\Sigma 1278b$ . Shaded areas correspond to regions with most skewed allele frequencies and genes with these regions are presented to scale. See Figure S3 for additional mapping results.

#### Figure S5 - Functional validation of the gene involved in drug resistance

- (a) Reciprocal hemizyosity test for the candidate gene *PDR1*. Sensitive ( $\Sigma 1278b$ ) and resistant (YJM326) parental isolates as well as hybrids that are wild type or hemizygous for the *PDR1* gene are spotted in 5 dilutions onto YPD (left panel) and YPD CHX 1 $\mu$ g/ml (right panel). Cells were grown for 48 hours at 30°C.
- (b) Ectopic expression of the resistance allele *PDR1*<sup>YJM326</sup> confers drug resistance in the sensitive strain  $\Sigma 1278b$  only with deletion of *PDR1*. Growth of strains carrying empty control plasmid (pCTRL) or plasmids with the resistant (pPDR1<sup>YJM326</sup>) or sensitive (pPDR1 <sup>$\Sigma 1278b$</sup> ) allele was tested in

the absence (left panel) or presence (right panel) of cycloheximide. All media were supplemented with 200µg/ml of hygromycin to maintain plasmid stability.

**Figure S6 - Fitness comparison in strains with ectopic expression of *PDR1*<sup>YJM326</sup> and in hybrid contexts.**

The fitness values for 20 isolates in the presence of cycloheximide were compared after hybridizing with the resistant isolate YJM326 (left panel) or after transformed with plasmid carrying the resistant allele pPDR1<sup>YJM326</sup> (right panel). Strains are indicated on y-axis, with color codes correspond to different configurations (hybrid or plasmid).

**Figure S7 - Offspring fitness distribution related to drug resistance in 20 hybrid backgrounds.**

Distributions of 80 offspring (20 full tetrads) and the lethal phenotype segregation patterns (upper right side) in the presence of cycloheximide are presented for 20 isolates crossed with YJM326. Parental fitness values are indicated at vertical bars, with red corresponds to the sensitive isolate crossed and blue the resistant parent YJM326. Different inheritance types are color-coded.

**Table S1. Origin and sequence divergence of strains used in this study**

**Table S2. Media compositions for conditions tested in this study**

**Supplementary references**

Liti, G., Carter, D.M., Moses, A.M., Warringer, J., Parts, L., James, S.A., Davey, R.P., Roberts, I.N., Burt, A., Koufopanou, V., *et al.* (2009). Population genomics of domestic and wild yeasts. *Nature* 458, 337-341.

Schacherer, J., Shapiro, J.A., Ruderfer, D.M., and Kruglyak, L. (2009). Comprehensive polymorphism survey elucidates population structure of *Saccharomyces cerevisiae*. *Nature* 458, 342-345.

**Table S1.**

| Strain    | Source                             | Location                              | Crossed with YJM326 | Estimated divergence to S288c (%) | References             |
|-----------|------------------------------------|---------------------------------------|---------------------|-----------------------------------|------------------------|
| BC187     | Barrel fermentation                | USA                                   |                     | 0.37                              | Liti et al. 2009       |
| YPS128    | Soil beneath <i>Quercus alba</i>   | Pennsylvania, USA                     |                     | 0.53                              | Liti et al. 2009       |
| DBVPG1106 | Grapes                             | Australia                             |                     | 0.35                              | Liti et al. 2009       |
| L-1374    | Wine                               | Chile                                 |                     | 0.36                              | Liti et al. 2009       |
| 378604X   | Clinical sputum                    | Newcastle, UK                         |                     | 0.41                              | Liti et al. 2009       |
| YJM975    | Clinical isolate (Vaginal)         | Bergamo, Italy                        |                     | 0.36                              | Liti et al. 2009       |
| DBVPG6044 | Bili wine                          | West Africa, Africa                   |                     | 0.60                              | Liti et al. 2009       |
| Y55       | Wine                               | France                                |                     | 0.54                              | Liti et al. 2009       |
| CLIB192   | Bakery                             | France                                |                     | 0.11                              | Schacherer et al. 2009 |
| CLIB272   | Beer                               | USA                                   | *                   | 0.23                              | Schacherer et al. 2009 |
| CLIB382   | Beer                               | Ireland                               |                     | 0.25                              | Schacherer et al. 2009 |
| YJM145    | AIDS patients                      | USA                                   |                     | 0.37                              | Schacherer et al. 2009 |
| YJM280    | Peritoneal fluid                   | USA                                   |                     | 0.35                              | Schacherer et al. 2009 |
| YJM320    | Blood                              | California, USA                       | *                   | 0.32                              | Schacherer et al. 2009 |
| YJM326    | Human, clinical                    | California, USA                       |                     | 0.32                              | Schacherer et al. 2009 |
| YJM421    | Ascites fluid                      | USA                                   | *                   | 0.35                              | Schacherer et al. 2009 |
| YJM434    | Human, clinical                    | Europe                                | *                   | 0.38                              | Schacherer et al. 2009 |
| YJM440    | Human, clinical                    | NA                                    | *                   |                                   | Schacherer et al. 2009 |
| YJM653    | Human, clinical                    | NA                                    | *                   |                                   | Schacherer et al. 2009 |
| YJM678    | Human, clinical                    | NA                                    | *                   |                                   | Schacherer et al. 2009 |
| CBS7960   | Ethanol factory (sugar cane syrup) | São Paulo, Brazil                     |                     | 0.39                              | Schacherer et al. 2009 |
| CECT10109 | Prickly pear                       | Spain                                 | *                   | 0.31                              | Schacherer et al. 2009 |
| DBVPG3591 | Cocoa beans                        | NA                                    | *                   | 0.23                              | Schacherer et al. 2009 |
| DBVPG6861 | Poluted stream water               | Tijuca forest, Rio de Janeiro, Brazil |                     |                                   | Schacherer et al. 2009 |
| EM93      | Rotting fig                        | California, USA                       | *                   | 0.14                              | Schacherer et al. 2009 |
| YPS1000   | Exudates <i>Quercus sp.</i>        | USA                                   |                     | 0.41                              | Schacherer et al. 2009 |
| YPS163    | Soil beneath <i>Quercus rubra</i>  | USA                                   |                     | 0.36                              | Schacherer et al. 2009 |
| CLIB294   | Distillery                         | France                                | *                   | 0.25                              | Schacherer et al. 2009 |
| CLIB413   | Fermenting rice                    | China                                 |                     | 0.33                              | Schacherer et al. 2009 |
| K12       | Sake                               | Japan                                 |                     | 0.25                              | Schacherer et al. 2009 |
| Y10       | Coconut                            | Philippines                           |                     | 0.49                              | Schacherer et al. 2009 |
| Y12       | Palm wine                          | Ivory Coast                           | *                   | 0.35                              | Schacherer et al. 2009 |
| Y3        | Palm wine                          | Africa                                | *                   | 0.38                              | Schacherer et al. 2009 |
| Y9        | Ragi fermentation                  | Indonesia                             | *                   | 0.34                              | Schacherer et al. 2009 |
| YJM269    | Red Blauer Portugieser grapes      | Austria                               | *                   | 0.38                              | Schacherer et al. 2009 |
| CLIB154   | Wine                               | Russia                                | *                   | 0.21                              | Schacherer et al. 2009 |
| I14       | Vineyard soil                      | Italy                                 | *                   | 0.25                              | Schacherer et al. 2009 |
| UC8       | Wine                               | South Africa, Africa                  | *                   | 0.28                              | Schacherer et al. 2009 |
| WE372     | Wine                               | South Africa, Africa                  |                     | 0.26                              | Schacherer et al. 2009 |
| NC02      | Exudates <i>Quercus sp.</i>        | North Carolina, USA                   |                     | 0.43                              | Schacherer et al. 2009 |
| T7        | Exudates <i>Quercus sp.</i>        | Babler State Park, MO, USA            | *                   | 0.49                              | Schacherer et al. 2009 |

**Table S2.**

| <b>Condition</b>                 | <b>Composition</b>                                       | <b>Stress type</b>       |
|----------------------------------|----------------------------------------------------------|--------------------------|
| <b>YPD</b>                       | 2% bactopectone; 1% yeast extract; 2% glucose; 2% agar   | Rich medium              |
| <b>YP acetate 2%</b>             | 2% bactopectone; 1% yeast extract; 2% acetate; 2% agar   | Carbon sources           |
| <b>YP EtOH 2%</b>                | 2% bactopectone; 1% yeast extract; 2% ethanol; 2% agar   | Carbon sources           |
| <b>YP glycerol 2%</b>            | 2% bactopectone; 1% yeast extract; 2% glycerol; 2% agar  | Carbon sources           |
| <b>YP sorbitol 2%</b>            | 2% bactopectone; 1% yeast extract; 2% sorbitol; 2% agar  | Carbon sources           |
| <b>YP galactose 2%</b>           | 2% bactopectone; 1% yeast extract; 2% galactose; 2% agar | Carbon sources           |
| <b>YP ribose 2%</b>              | 2% bactopectone; 1% yeast extract; 2% ribose; 2% agar    | Carbon sources           |
| <b>YP xylose 2%</b>              | 2% bactopectone; 1% yeast extract; 2% xylose; 2% agar    | Carbon sources           |
| <b>YPD formamide 4%</b>          | YPD; formamide 4%                                        | Protein stability        |
| <b>YPD formamide 5%</b>          | YPD; formamide 5%                                        | Protein stability        |
| <b>YPD EtOH 15%</b>              | YPD; ethanol 15%                                         | Protein stability        |
| <b>YPD benomyl 200µg/ml</b>      | YPD; benomyl 200µg/ml                                    | Subcellular organization |
| <b>YPD benomyl 500µg/ml</b>      | YPD; benomyl 500µg/ml                                    | Subcellular organization |
| <b>YPD SDS 0.2%</b>              | YPD; SDS 0.2%                                            | Membrane stability       |
| <b>YPD DMSO 6%</b>               | YPD; DMSO 6%                                             | Membrane stability       |
| <b>YPD KCl 2M</b>                | YPD; KCl 2M                                              | Osmotic stress           |
| <b>YPD NaCl 1M</b>               | YPD; NaCl 1M                                             | Osmotic stress           |
| <b>YPD NaCl 1.5M</b>             | YPD; NaCl 1.5M                                           | Osmotic stress           |
| <b>YPD CuSO<sub>4</sub> 10mM</b> | YPD; CuSO <sub>4</sub> 10mM                              | Osmotic stress           |
| <b>YPD CuSO<sub>4</sub> 15mM</b> | YPD; CuSO <sub>4</sub> 15mM                              | Osmotic stress           |
| <b>YPD LiCl 250mM</b>            | YPD; LiCl 250mM                                          | Osmotic stress           |
| <b>YPD CHX 0.5µg/ml</b>          | YPD; cycloheximide 0.5µg/ml                              | Translation              |
| <b>YPD CHX 1µg/ml</b>            | YPD; cycloheximide 1µg/ml                                | Translation              |
| <b>YPD anisomycin 10µg/ml</b>    | YPD; anisomycin 10µg/ml                                  | Translation              |
| <b>YPD anisomycin 20µg/ml</b>    | YPD; anisomycin 20µg/ml                                  | Translation              |
| <b>YPD anisomycin 50µg/ml</b>    | YPD; anisomycin 50µg/ml                                  | Translation              |
| <b>YPD caffeine 40mM</b>         | YPD; caffeine 40mM                                       | Signal transduction      |
| <b>YPD caffeine 50mM</b>         | YPD; caffeine 50mM                                       | Signal transduction      |
| <b>YPD 6AU 600µg/ml</b>          | YPD; 6-azauracile 600µg/ml                               | Transcription            |
| <b>YPD nystatin 10µg/ml</b>      | YPD; nystatin 10µg/ml                                    | Sterol biosynthesis      |
| <b>YPD Mv 20mM</b>               | YPD; methylviologen 20mM                                 | Oxydative stress         |

Figure S1.

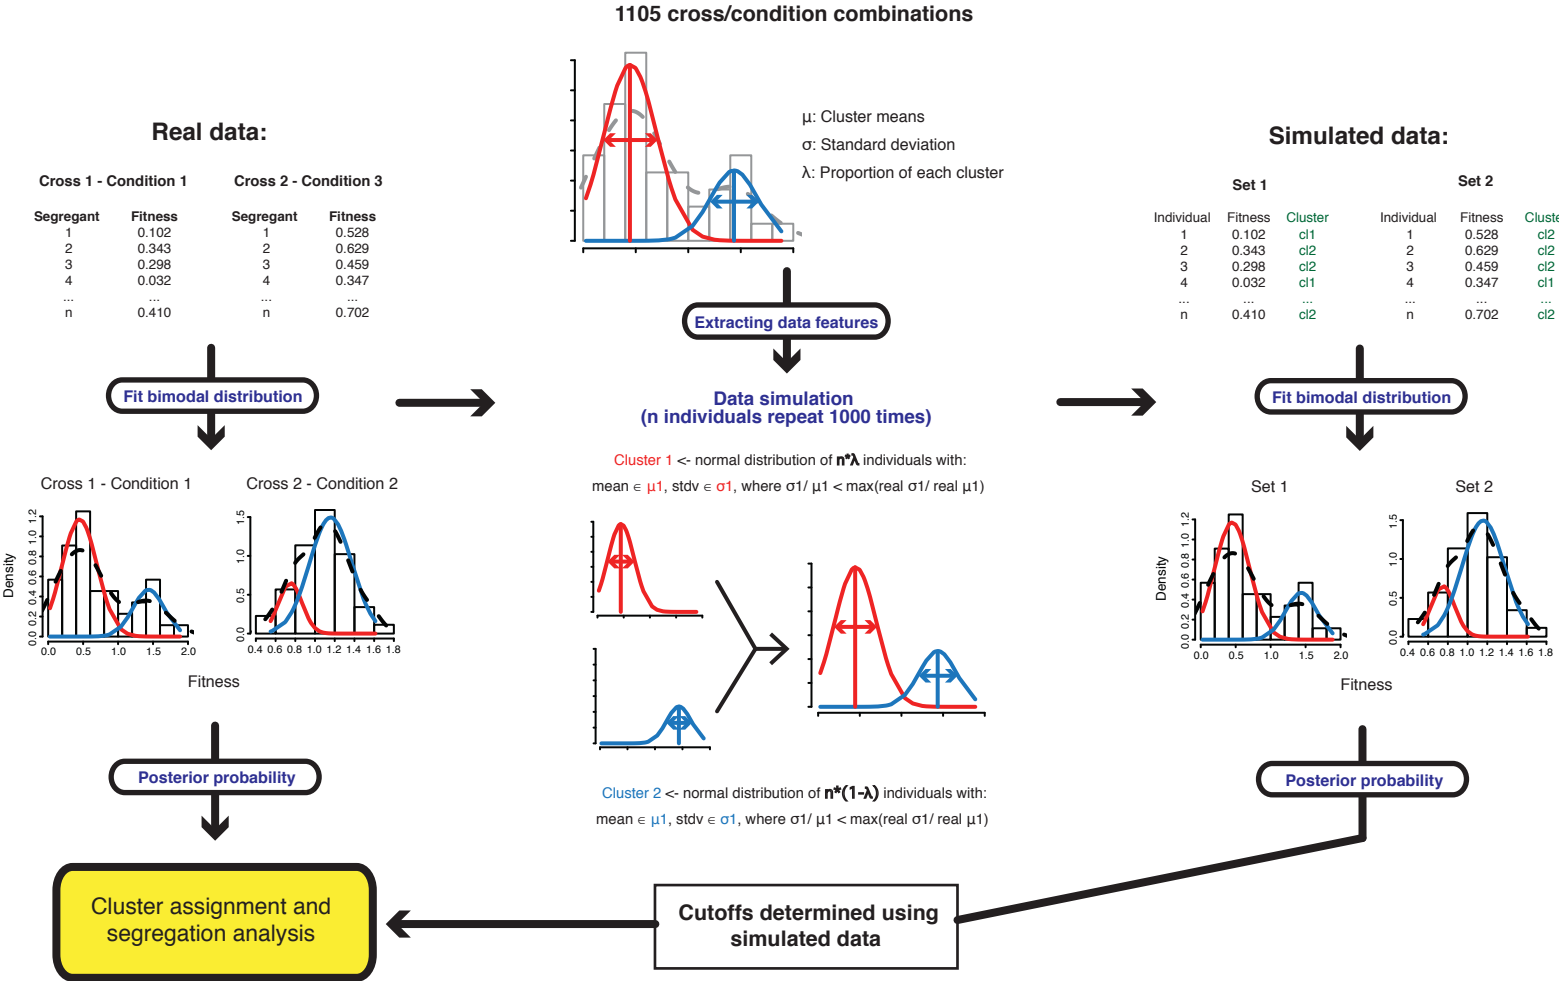

Figure S2.

A.

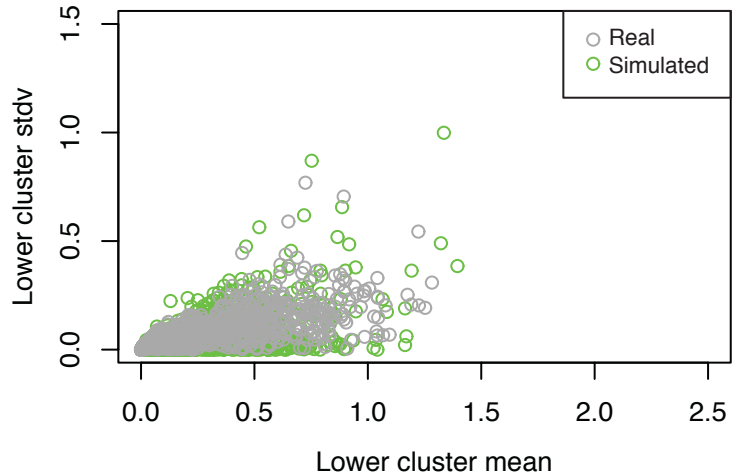

B.

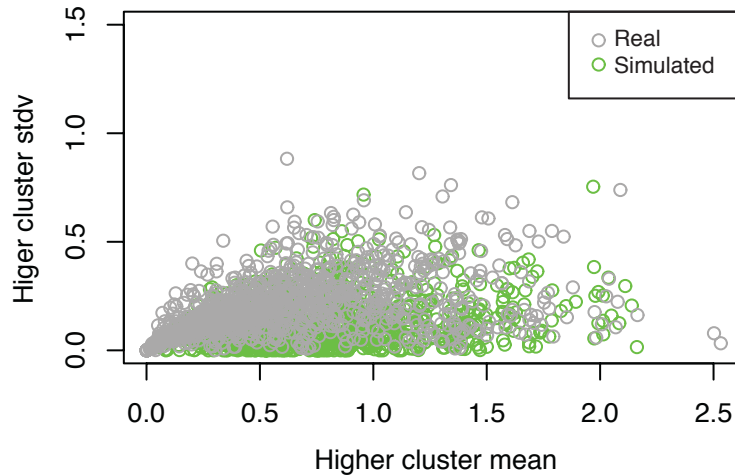

C.

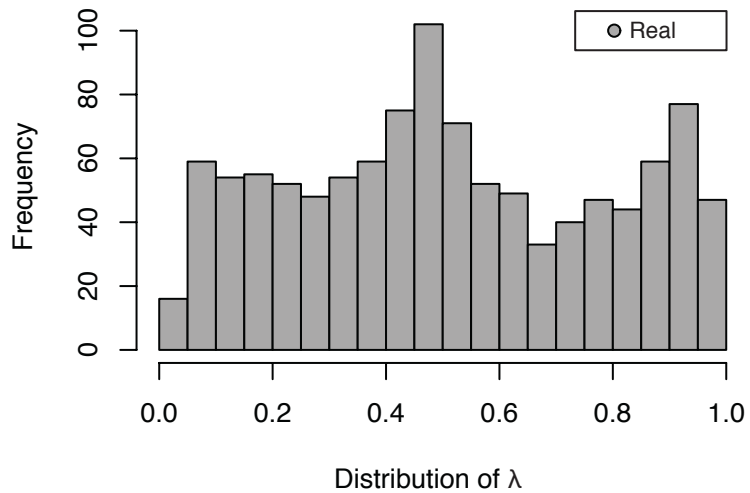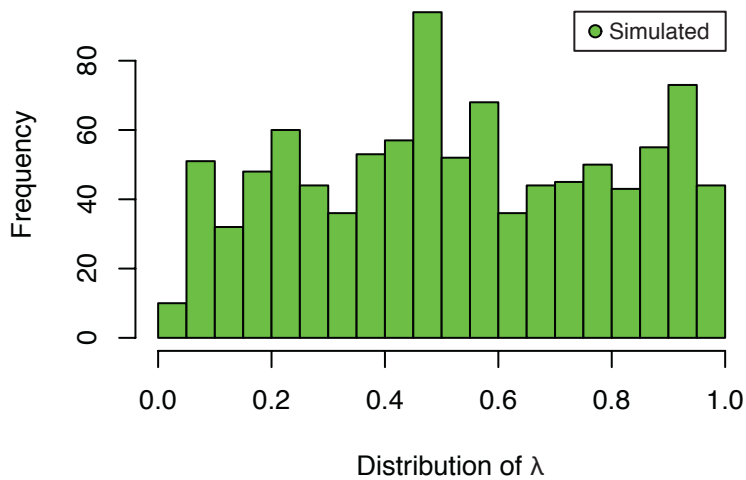

Figure S3.

A.

### Area Under the ROC (AUC)

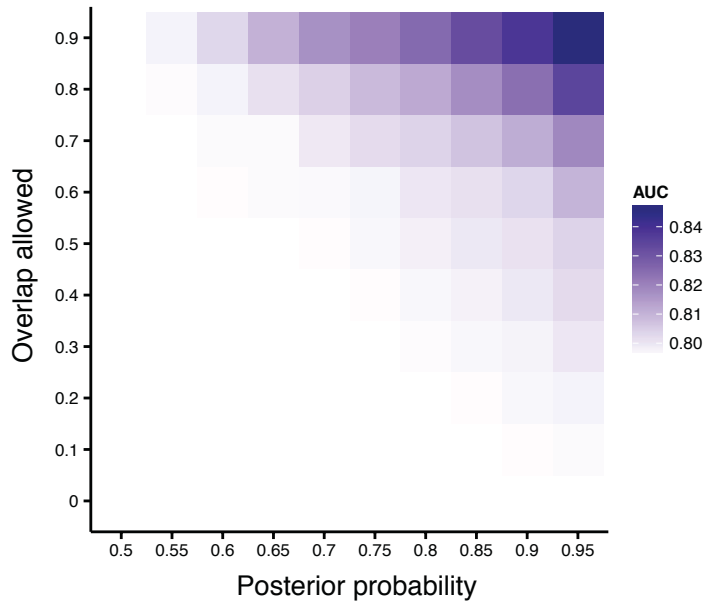

B.

### Number of cases retained

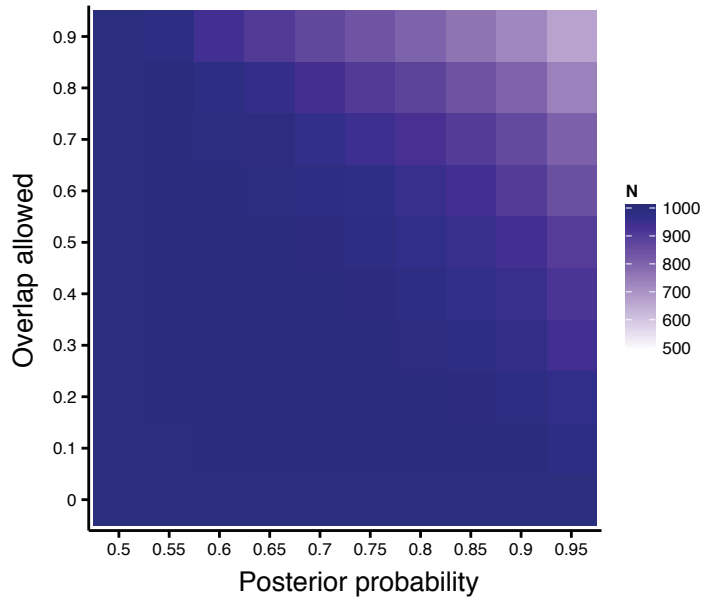

**Figure S4.**

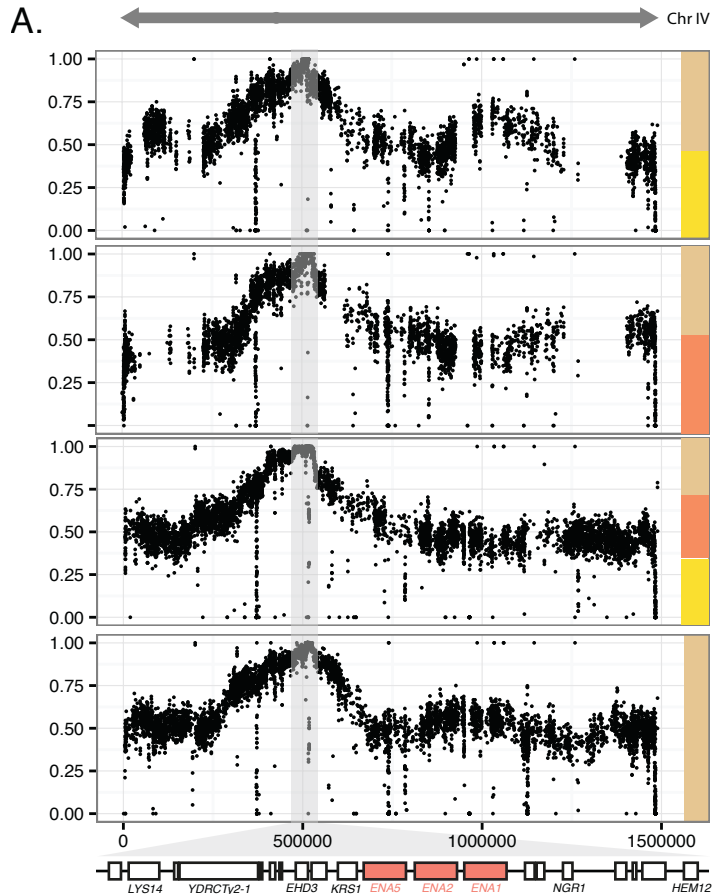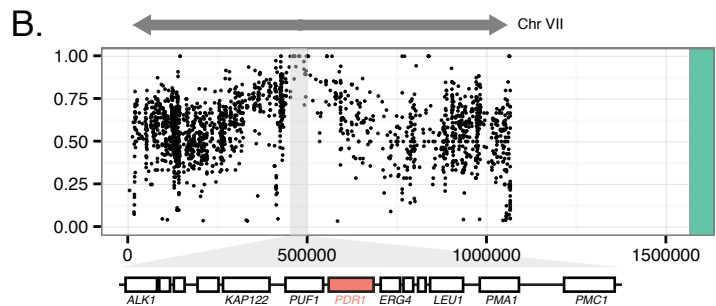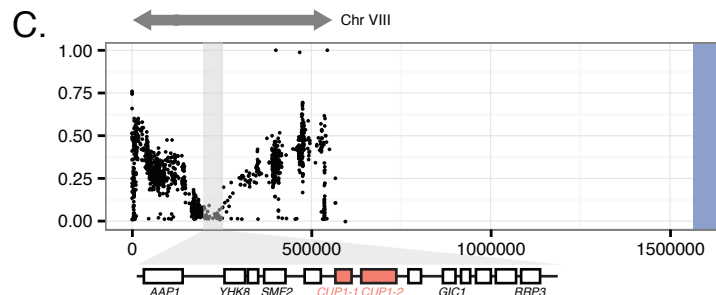

**Co-segregation groups**

- |                                                                                                                                                                           |                                                                                                                                                                            |
|---------------------------------------------------------------------------------------------------------------------------------------------------------------------------|----------------------------------------------------------------------------------------------------------------------------------------------------------------------------|
| <span style="display: inline-block; width: 10px; height: 10px; background-color: #e69d00; border: 1px solid black; margin-right: 5px;"></span> NaCl + LiCl                | <span style="display: inline-block; width: 10px; height: 10px; background-color: #f4a460; border: 1px solid black; margin-right: 5px;"></span> NaCl + LiCl + 6AU           |
| <span style="display: inline-block; width: 10px; height: 10px; background-color: #4db6ac; border: 1px solid black; margin-right: 5px;"></span> Cycloheximide + Anisomycin | <span style="display: inline-block; width: 10px; height: 10px; background-color: #fff176; border: 1px solid black; margin-right: 5px;"></span> NaCl + LiCl + Acetate       |
| <span style="display: inline-block; width: 10px; height: 10px; background-color: #64b5f6; border: 1px solid black; margin-right: 5px;"></span> CuSO <sub>4</sub>          | <span style="display: inline-block; width: 10px; height: 10px; background-color: #fff9c4; border: 1px solid black; margin-right: 5px;"></span> NaCl + LiCl + 6AU + Acetate |



Figure S5.

A.

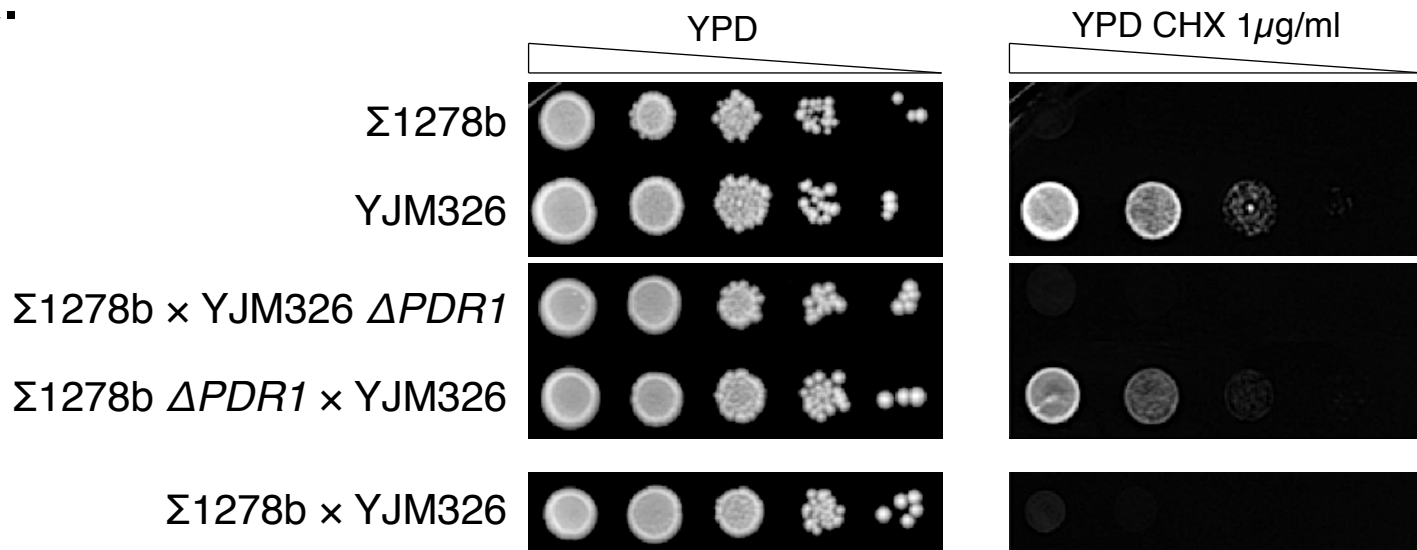

B.

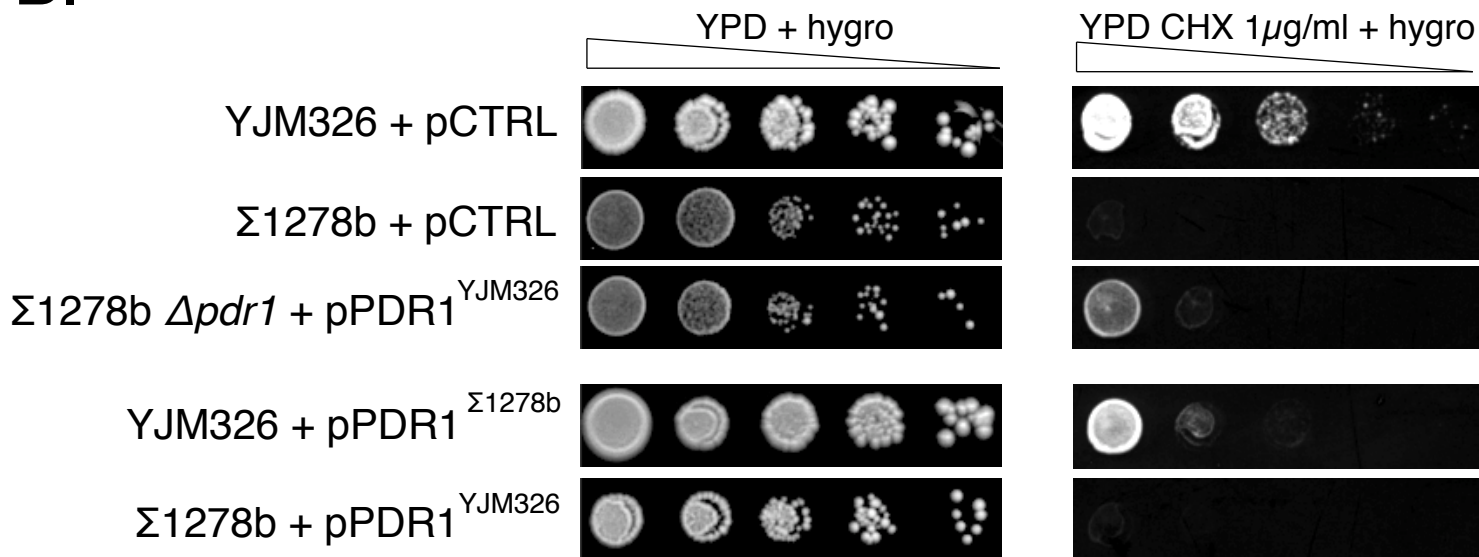

Figure S6.

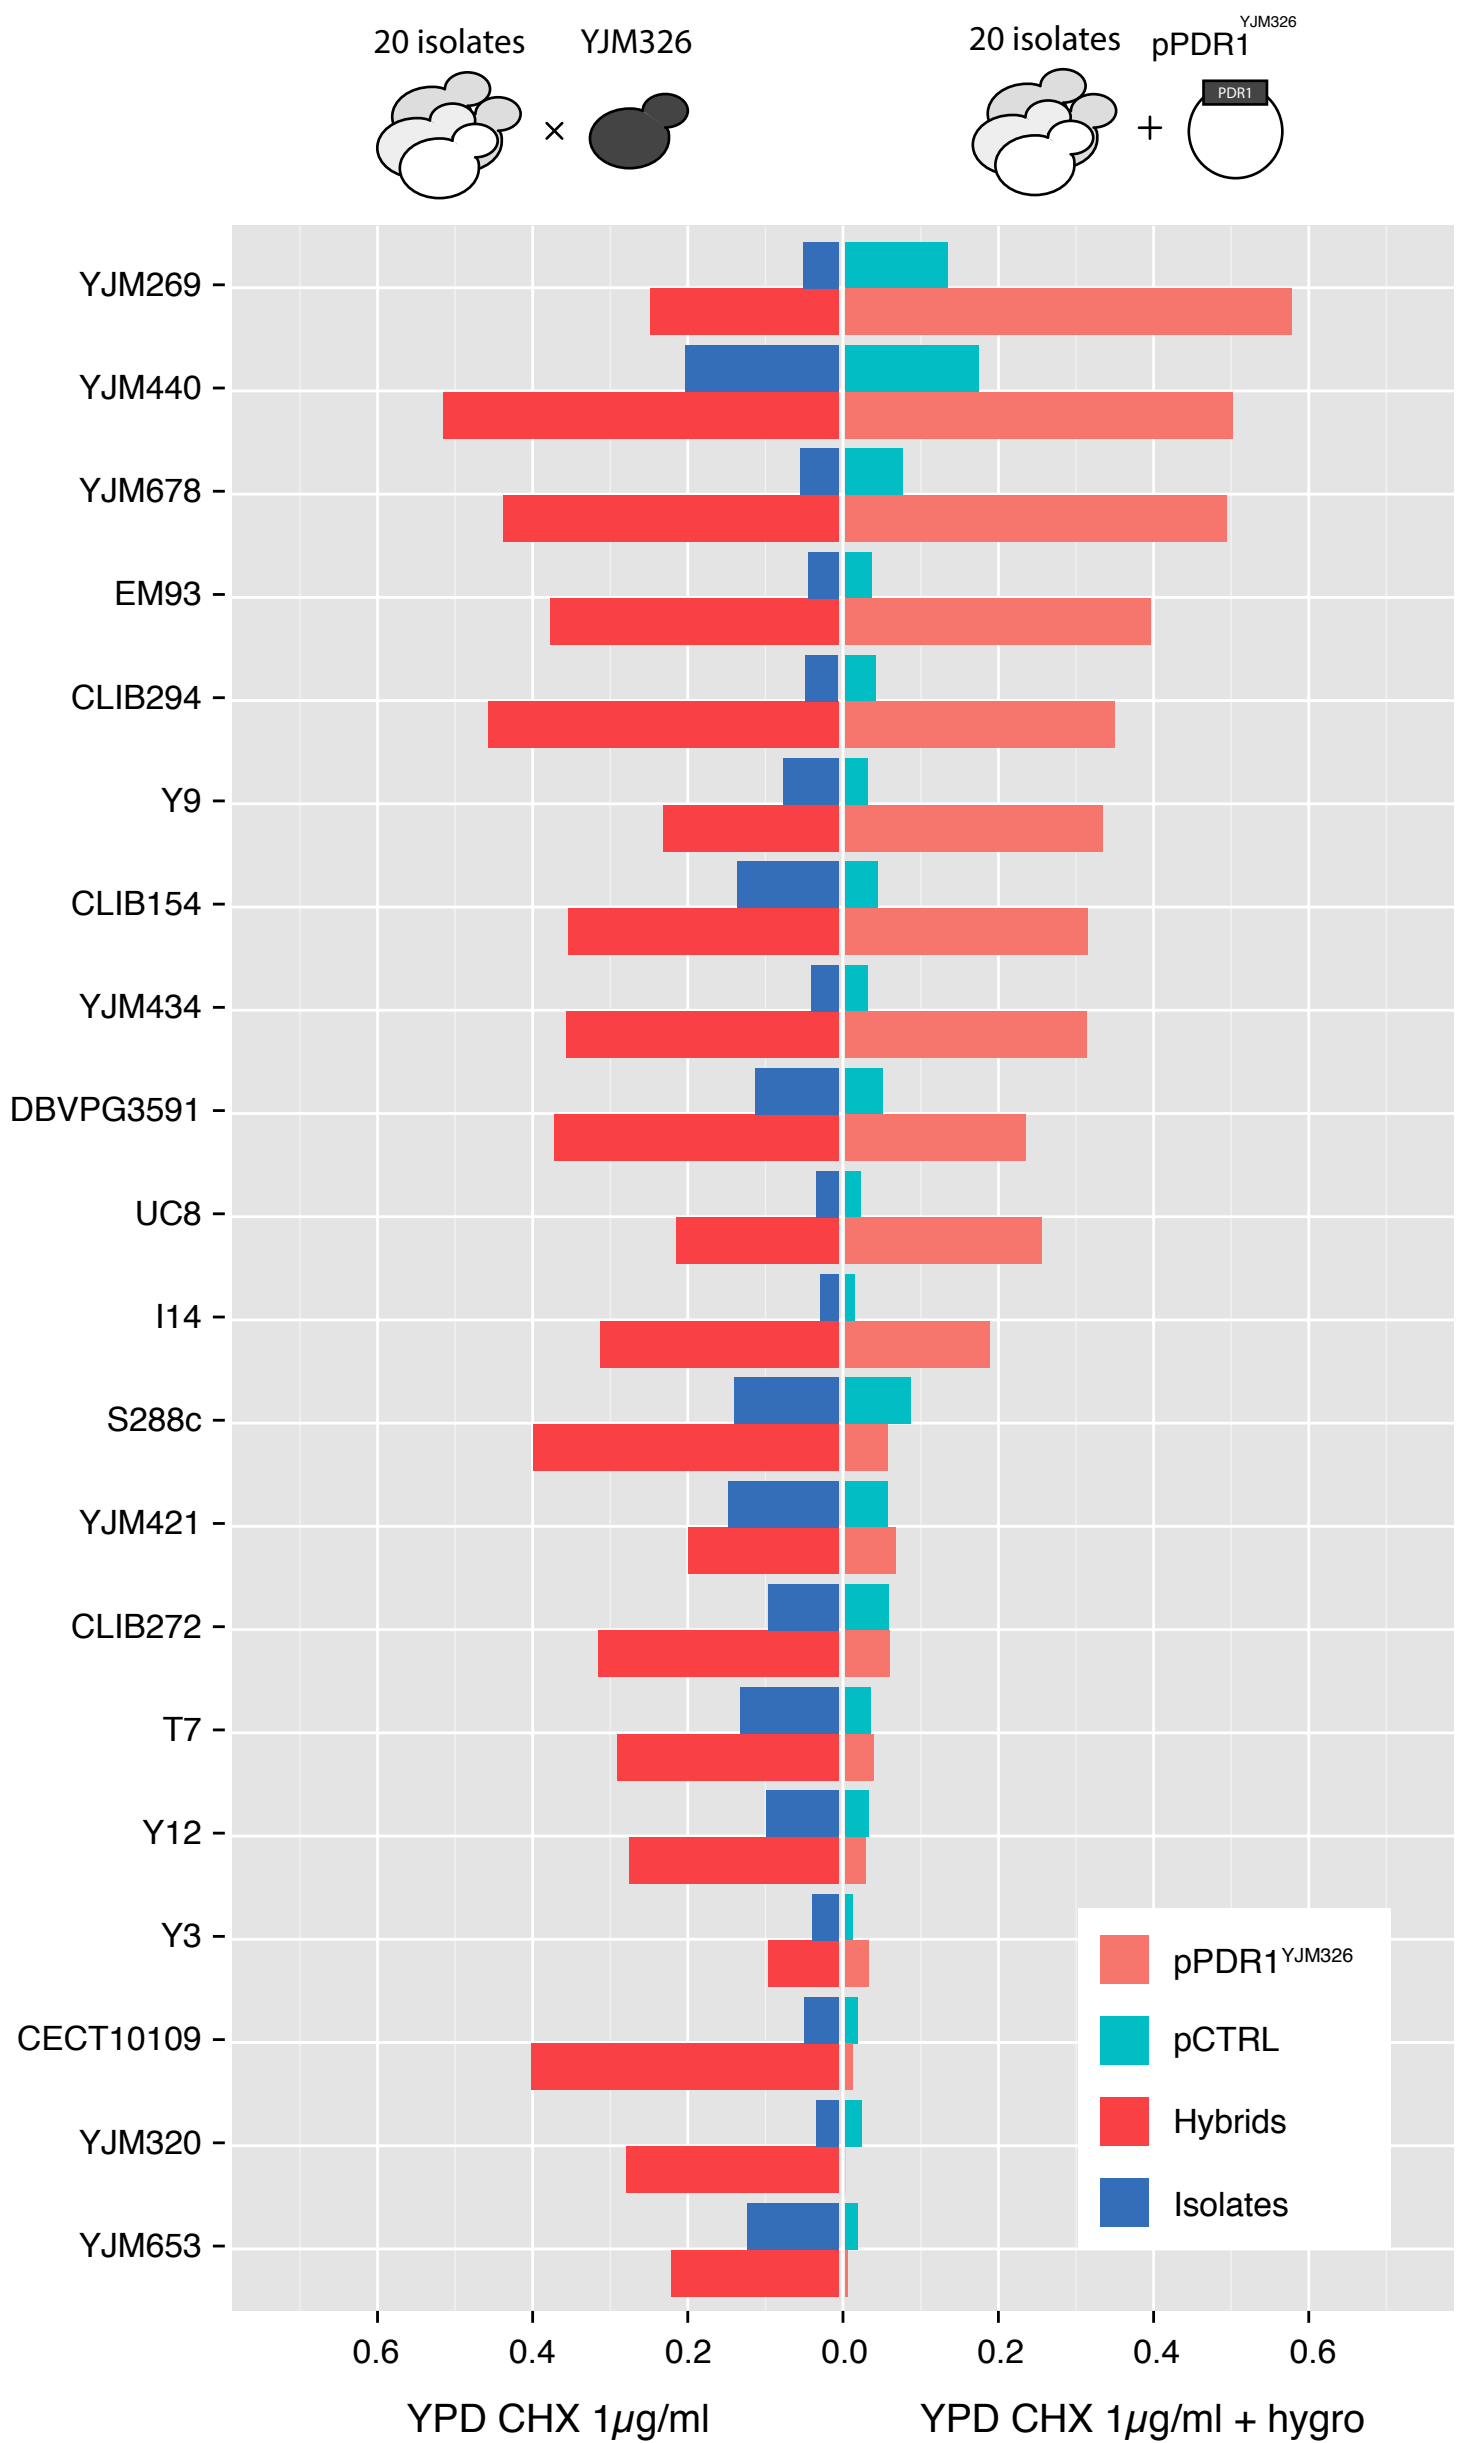

Figure S7.

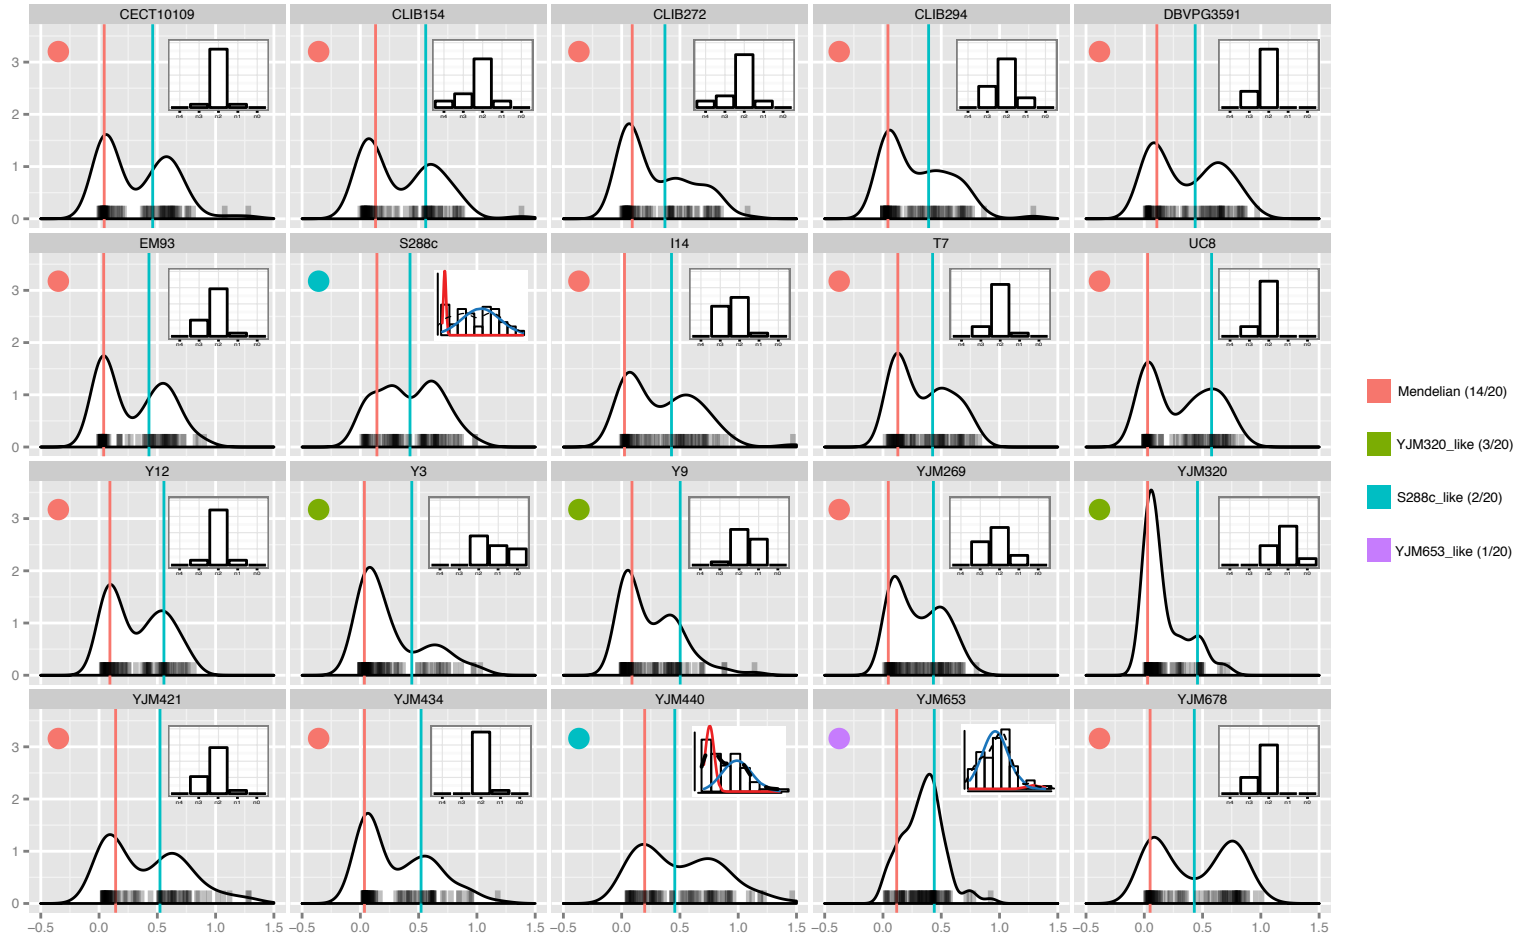

Supplement: Supplementary file [file 039693-1.pdf]
